# Supplementary material for: A silica co-electrodeposition route to highly active Ni-based film electrodes
Source: Royal Society of Chemistry journal article supplement (doi:10.1039/c3ta12503c), 2013-01-01
Supplement: c3ta12503c.pdf [file c3ta12503c.pdf]

## Supporting Information for:

### **A silica co-electrodeposition route to highly active Ni-based film electrode**

**Liankui Wu,<sup>a</sup> Jiming Hu,<sup>\*a</sup> Jianqing Zhang,<sup>a,b</sup> and Chunan Cao<sup>a</sup>**

<sup>a</sup> *Department of Chemistry, Zhejiang University, Hangzhou 310027, China. Fax: +86-571-87951895; Tel: +86-571-87953297. E-mail: [kejmh@zju.edu.cn](mailto:kejmh@zju.edu.cn)*

<sup>b</sup> *State Key Laboratory for Corrosion and Protection, Institute of Metal Research, The Chinese Academy of Sciences, Shenyang 110016, China*

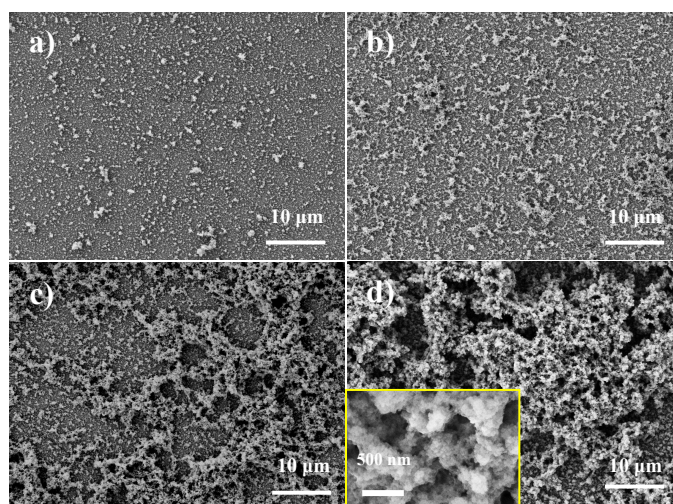

Fig. S1 Morphology of the SiO<sub>2</sub> films electrodeposited at -1.1 V vs. Ag/AgCl for 600 s (a), 1200 s (b), 1800 s (c) and 2400 s (d). The deposition precursor contains 45 mL of 0.2 M Na<sub>2</sub>SO<sub>4</sub> / 0.2 M H<sub>3</sub>BO<sub>3</sub>, 5 mL ethanol and 0.25 mL TMOS. Inset shows the high magnification image.

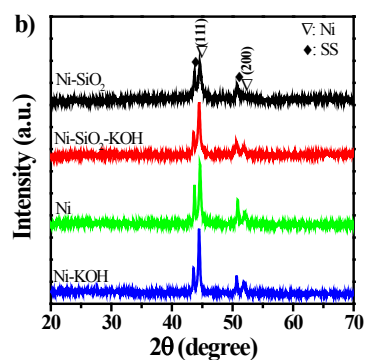

Fig. S2. XRD patterns of Ni and Ni-SiO<sub>2</sub> films before and after 50 repeated CV scans in 1.0 M KOH.

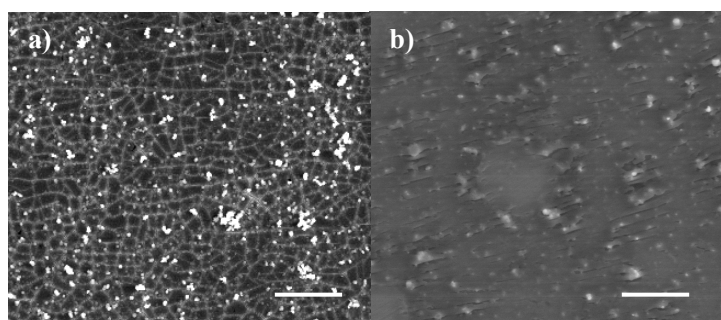

Fig. S3 SEM (a) and environment-SEM (b) images of the Ni-SiO<sub>2</sub> films. The scale bars correspond to 25 μm.

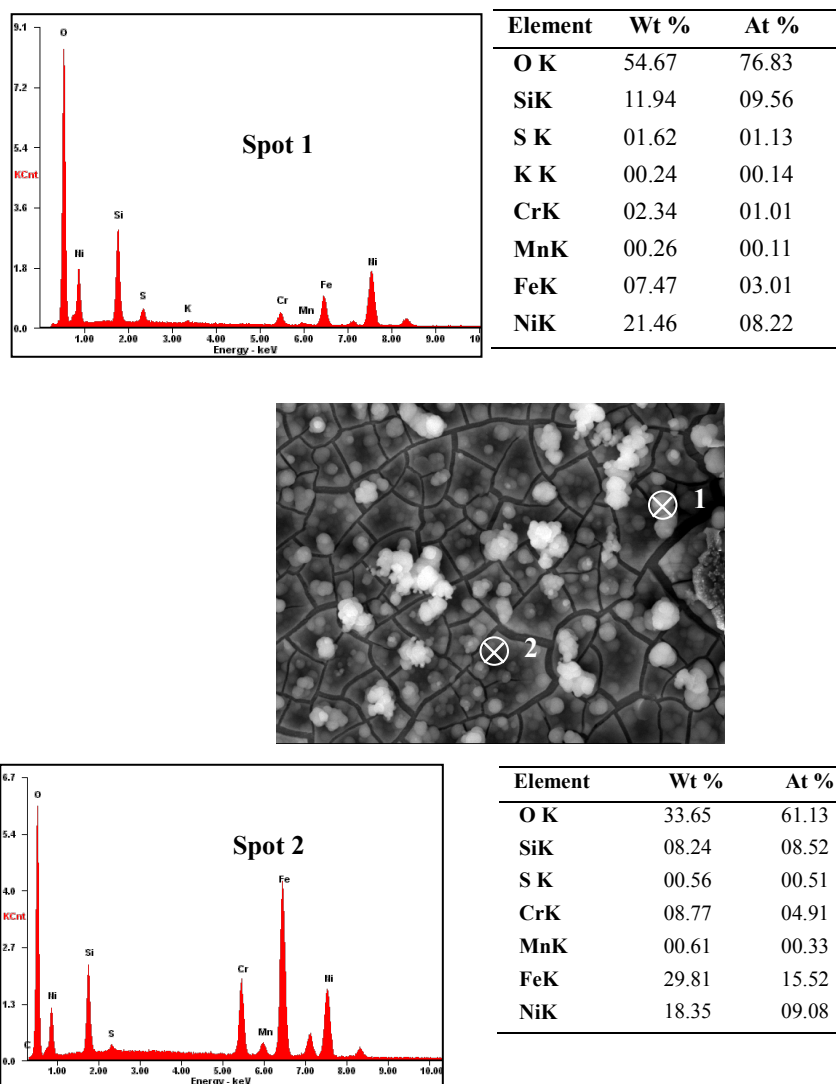

Fig. S4 A scanning electron microscopy graph of a SS electrode coated with Ni-SiO<sub>2</sub> film, and the energy dispersive spectra taken from two typical positions of the film. The elements of Cr, Fe and Mn are from the SS substrate.

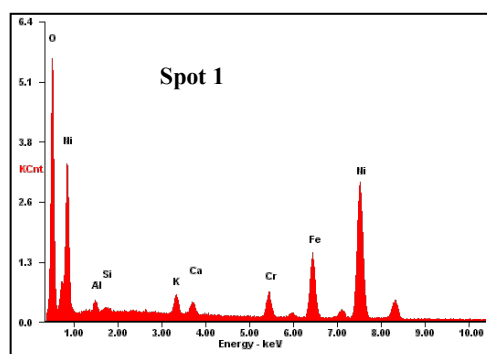

| Element | Wt %  | At %  |
|---------|-------|-------|
| O K     | 40.72 | 70.04 |
| AlK     | 01.83 | 01.87 |
| SiK     | 00.51 | 00.50 |
| K K     | 01.75 | 01.23 |
| CrK     | 03.53 | 01.87 |
| FeK     | 11.78 | 05.80 |
| NiK     | 39.88 | 18.69 |

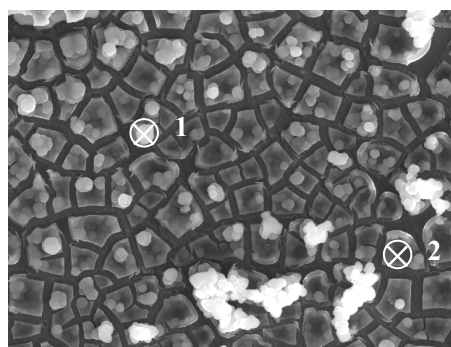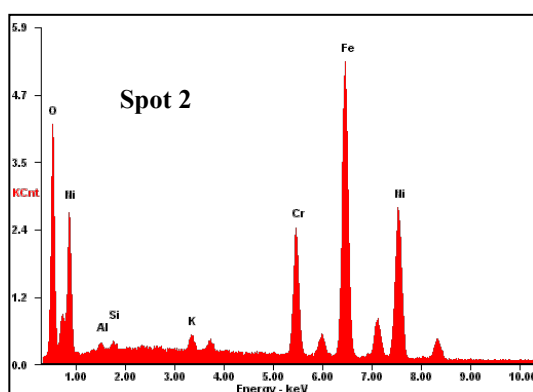

| Element | Wt %  | At %  |
|---------|-------|-------|
| O K     | 23.10 | 50.73 |
| AlK     | 00.95 | 01.24 |
| SiK     | 00.67 | 00.84 |
| K K     | 00.88 | 00.79 |
| CrK     | 10.29 | 06.95 |
| FeK     | 35.73 | 22.48 |
| NiK     | 28.38 | 16.98 |

Fig. S5 A scanning electron microscopy graph of a SS electrode coated with Ni-SiO<sub>2</sub>-KOH film, and the energy dispersive spectra taken from two typical positions of the film. The elements of Cr, Fe and Mn are from the SS substrate.

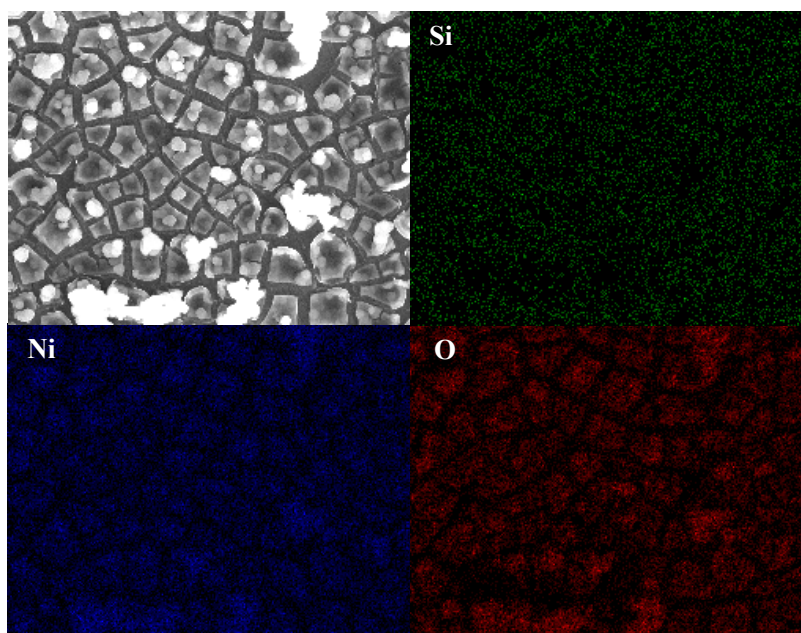

Fig. S6 A scanning electron micrograph of a SS electrode coated with Ni-SiO<sub>2</sub> film after underwent 50 repeated CV scan in 1.0 M KOH at scan rate of 20 mV s<sup>-1</sup> and the corresponding energy dispersive X-ray maps of the same sample showing the dispersion of Si, O, Ni on the SS surface.

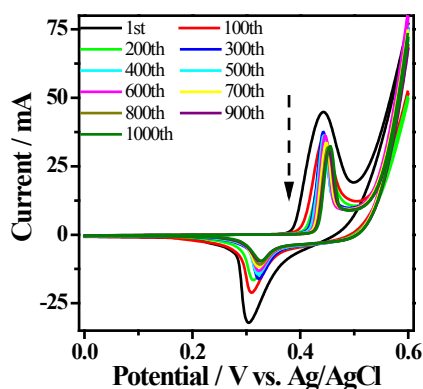

Fig. S7 Consecutive CV curves between 0 and 0.6 V for po-Ni film conducted in 1.0 M KOH at scan rate of 100 mV s<sup>-1</sup>. The dotted arrow indicates the change direction of the anodic current density with the increasing scan number.

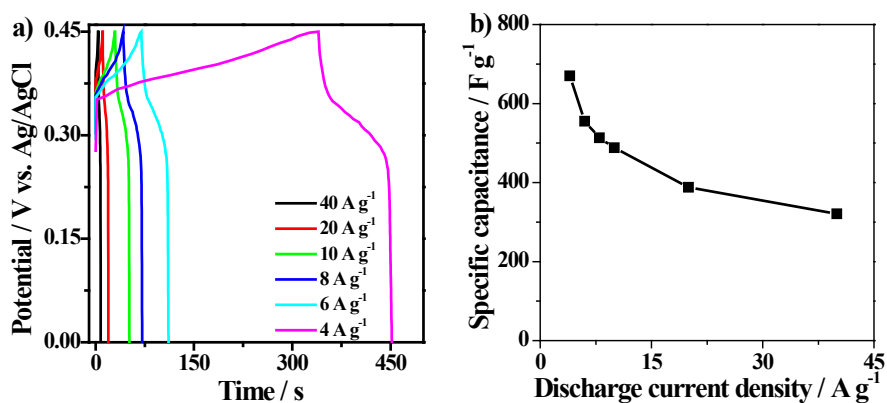

Fig. S8 (a) Galvanostatic charge-discharge curves at 4 - 40 A g<sup>-1</sup>, (b) specific capacitance calculated from discharge curves of the po-Ni films in 1.0 M KOH.

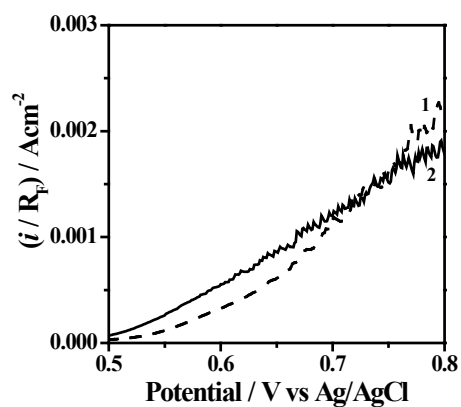

Fig. S9 The roughness factor-normalized current polarization curves toward OER for Ni (1) and po-Ni (2) film electrodes in 1.0 M KOH.

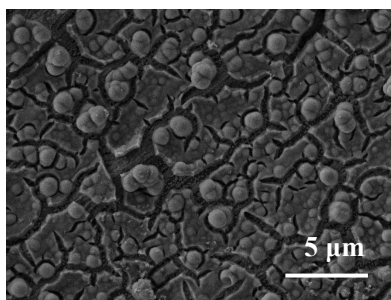

Fig. S10 SEM image of po-Ni film electrode after underwent 5 days electrolysis in 1.0 M KOH at 100 mA cm<sup>-2</sup>.

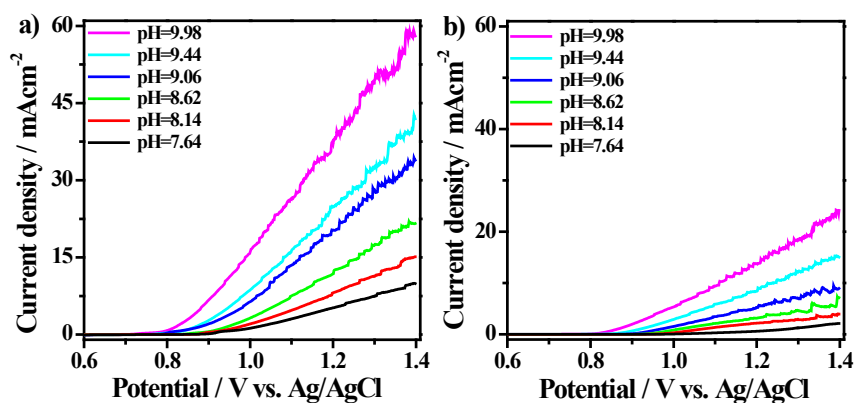

Fig. S11 Steady-state polarization curves of po-Ni (a) and Ni (b) films recorded in 1.0 M H<sub>3</sub>BO<sub>3</sub> with a series of pH from 7.64 to 9.98.
